# Supplementary material
Source: PubMed Central journal article supplement (PMC406462)
Supplement: pnas_101_18_7040__2.pdf [file pnas_101_18_7040__2.pdf]

Table 4. Phenotypic distribution of a simulated full-sib family from crossing two autotetraploid genotypes AA/BB/BB/OB and CA/DA/EC/EO under quadrivalent pairing model. The phenotype codes represent the presence ("1") or the absence ("0") of an allele in individual genotype, and different alleles are separated by their presence in the code sequence.

| P <sub>1</sub> | 11000000 | 11000000 | nc(i,3,k,l)                 |      |      |      |     |      |                             |      |      |      |                             |      |      |      | $f_i$<br>( $\alpha = 0.1, r = 0.1$ ) |        |
|----------------|----------|----------|-----------------------------|------|------|------|-----|------|-----------------------------|------|------|------|-----------------------------|------|------|------|--------------------------------------|--------|
|                |          |          | $k = 0, l = 0, 1, \dots, 4$ |      |      |      |     |      | $k = 1, l = 0, 1, \dots, 4$ |      |      |      | $k = 2, l = 0, 1, \dots, 4$ |      |      |      |                                      |        |
| 1              | 11101000 | 11000000 | 648                         | 2592 | 3672 | 2496 | 672 | 0    | 0                           | 0    | 0    | 0    | 0                           | 0    | 0    | 0    | 0                                    | 0.0449 |
| 2              | 01101000 | 11100000 | 972                         | 2592 | 3348 | 2304 | 624 | 972  | 2592                        | 3348 | 2304 | 624  | 0                           | 0    | 0    | 0    | 0                                    | 0.0660 |
| 3              | 01110000 | 11000000 | 972                         | 3240 | 3780 | 1872 | 336 | 972  | 3240                        | 3780 | 1872 | 336  | 0                           | 0    | 0    | 0    | 0                                    | 0.0699 |
| 4              | 11100000 | 11100000 | 0                           | 0    | 0    | 0    | 0   | 0    | 648                         | 1620 | 1224 | 324  | 0                           | 0    | 0    | 0    | 0                                    | 0.0005 |
| 5              | 01011000 | 11000000 | 972                         | 3888 | 5940 | 3888 | 912 | 972  | 3888                        | 5940 | 3888 | 912  | 0                           | 0    | 0    | 0    | 0                                    | 0.0751 |
| 6              | 11001000 | 11100000 | 648                         | 1080 | 1296 | 792  | 168 | 972  | 3240                        | 3888 | 2520 | 468  | 0                           | 0    | 0    | 0    | 0                                    | 0.0428 |
| 7              | 11011000 | 11000000 | 648                         | 2592 | 3672 | 2496 | 672 | 0    | 0                           | 0    | 0    | 0    | 0                           | 0    | 0    | 0    | 0                                    | 0.0449 |
| 8              | 01001000 | 01100000 | 972                         | 1620 | 972  | 288  | 48  | 2430 | 5508                        | 4374 | 1368 | 120  | 1458                        | 3888 | 3402 | 1080 | 72                                   | 0.0698 |
| 9              | 10110000 | 11000000 | 324                         | 972  | 1188 | 636  | 120 | 0    | 972                         | 1782 | 1080 | 162  | 0                           | 0    | 0    | 0    | 0                                    | 0.0211 |
| 10             | 11011000 | 11100000 | 648                         | 2160 | 2376 | 1392 | 432 | 0    | 0                           | 0    | 0    | 0    | 0                           | 0    | 0    | 0    | 0                                    | 0.0419 |
| 11             | 11110000 | 11000000 | 648                         | 1944 | 2376 | 1272 | 240 | 0    | 0                           | 0    | 0    | 0    | 0                           | 0    | 0    | 0    | 0                                    | 0.0408 |
| 12             | 10011000 | 11000000 | 324                         | 1296 | 1836 | 1248 | 336 | 0    | 972                         | 2754 | 2052 | 486  | 0                           | 0    | 0    | 0    | 0                                    | 0.0232 |
| 13             | 01001000 | 11100000 | 0                           | 1296 | 2160 | 1224 | 240 | 0    | 4212                        | 8640 | 5220 | 888  | 0                           | 2916 | 6480 | 3996 | 648                                  | 0.0110 |
| 14             | 01011000 | 11100000 | 972                         | 2592 | 3348 | 2304 | 624 | 972  | 2592                        | 3348 | 2304 | 624  | 0                           | 0    | 0    | 0    | 0                                    | 0.0660 |
| 15             | 01101000 | 11000000 | 972                         | 3888 | 5940 | 3888 | 912 | 972  | 3888                        | 5940 | 3888 | 912  | 0                           | 0    | 0    | 0    | 0                                    | 0.0751 |
| 16             | 01011000 | 01100000 | 0                           | 972  | 1620 | 864  | 144 | 0    | 972                         | 1620 | 864  | 144  | 0                           | 0    | 0    | 0    | 0                                    | 0.0065 |
| 17             | 01101000 | 01100000 | 0                           | 972  | 1620 | 864  | 144 | 0    | 972                         | 1620 | 864  | 144  | 0                           | 0    | 0    | 0    | 0                                    | 0.0065 |
| 18             | 11101000 | 11100000 | 648                         | 2160 | 2376 | 1392 | 432 | 0    | 0                           | 0    | 0    | 0    | 0                           | 0    | 0    | 0    | 0                                    | 0.0419 |
| 19             | 00101000 | 11100000 | 0                           | 0    | 0    | 0    | 0   | 486  | 1296                        | 1674 | 1152 | 312  | 0                           | 0    | 0    | 0    | 0                                    | 0.0033 |
| 20             | 10101000 | 11100000 | 324                         | 1080 | 1188 | 696  | 216 | 0    | 972                         | 2106 | 1188 | 270  | 0                           | 0    | 0    | 0    | 0                                    | 0.0216 |
| 21             | 00001000 | 01100000 | 0                           | 0    | 0    | 0    | 0   | 486  | 810                         | 486  | 144  | 24   | 729                         | 1944 | 1701 | 540  | 36                                   | 0.0035 |
| 22             | 01100000 | 11000000 | 0                           | 0    | 0    | 0    | 0   | 1458 | 4860                        | 5670 | 2808 | 504  | 1458                        | 4860 | 5670 | 2808 | 504                                  | 0.0117 |
| 23             | 01001000 | 01000000 | 0                           | 324  | 432  | 144  | 0   | 1458 | 2268                        | 1242 | 360  | 72   | 1458                        | 1944 | 810  | 216  | 72                                   | 0.0116 |
| 24             | 00011000 | 11100000 | 0                           | 0    | 0    | 0    | 0   | 486  | 1296                        | 1674 | 1152 | 312  | 0                           | 0    | 0    | 0    | 0                                    | 0.0033 |
| 25             | 10011000 | 11100000 | 324                         | 1080 | 1188 | 696  | 216 | 0    | 972                         | 2106 | 1188 | 270  | 0                           | 0    | 0    | 0    | 0                                    | 0.0216 |
| 26             | 11001000 | 01100000 | 0                           | 648  | 648  | 216  | 48  | 0    | 972                         | 1944 | 972  | 72   | 0                           | 0    | 0    | 0    | 0                                    | 0.0043 |
| 27             | 11011000 | 01100000 | 0                           | 0    | 648  | 648  | 144 | 0    | 0                           | 0    | 0    | 0    | 0                           | 0    | 0    | 0    | 0                                    | 0.0004 |
| 28             | 10010000 | 11000000 | 0                           | 0    | 0    | 0    | 0   | 486  | 1458                        | 1782 | 954  | 180  | 0                           | 1458 | 2673 | 1620 | 243                                  | 0.0035 |
| 29             | 10101000 | 11000000 | 324                         | 1296 | 1836 | 1248 | 336 | 0    | 972                         | 2754 | 2052 | 486  | 0                           | 0    | 0    | 0    | 0                                    | 0.0232 |
| 30             | 11101000 | 10100000 | 0                           | 216  | 360  | 192  | 0   | 0    | 0                           | 0    | 0    | 0    | 0                           | 0    | 0    | 0    | 0                                    | 0.0013 |
| 31             | 11011000 | 01000000 | 0                           | 0    | 216  | 216  | 48  | 0    | 0                           | 0    | 0    | 0    | 0                           | 0    | 0    | 0    | 0                                    | 0.0001 |
| 32             | 01001000 | 11000000 | 0                           | 648  | 2160 | 2016 | 576 | 0    | 3564                        | 8640 | 7740 | 2376 | 0                           | 2916 | 6480 | 5724 | 800                                  | 0.0075 |
| 33             | 10001000 | 11100000 | 324                         | 540  | 648  | 396  | 84  | 486  | 2592                        | 2916 | 1908 | 342  | 0                           | 1458 | 3888 | 1782 | 324                                  | 0.0221 |
| 34             | 10101000 | 10000000 | 0                           | 108  | 252  | 120  | 0   | 486  | 1134                        | 540  | 0    | 0    | 0                           | 0    | 0    | 0    | 0                                    | 0.0038 |
| 35             | 01110000 | 11100000 | 0                           | 648  | 1512 | 1224 | 336 | 0    | 648                         | 1512 | 1224 | 336  | 0                           | 0    | 0    | 0    | 0                                    | 0.0047 |
| 36             | 10100000 | 11000000 | 0                           | 0    | 0    | 0    | 0   | 486  | 1458                        | 1782 | 954  | 180  | 0                           | 1458 | 2673 | 1620 | 243                                  | 0.0035 |
| 37             | 01010000 | 11000000 | 0                           | 0    | 0    | 0    | 0   | 1458 | 4860                        | 5670 | 2808 | 504  | 1458                        | 4860 | 5670 | 2808 | 504                                  | 0.0117 |
| 38             | 11001000 | 11000000 | 0                           | 648  | 1296 | 1224 | 432 | 972  | 1944                        | 3888 | 3528 | 1332 | 0                           | 0    | 0    | 0    | 0                                    | 0.0104 |
| 39             | 10110000 | 10000000 | 0                           | 108  | 144  | 48   | 0   | 486  | 648                         | 216  | 0    | 0    | 0                           | 0    | 0    | 0    | 0                                    | 0.0035 |
| 40             | 01011000 | 01000000 | 0                           | 324  | 540  | 288  | 48  | 0    | 324                         | 540  | 288  | 48   | 0                           | 0    | 0    | 0    | 0                                    | 0.0022 |
| 41             | 00001000 | 01000000 | 0                           | 0    | 0    | 0    | 0   | 0    | 162                         | 216  | 72   | 0    | 729                         | 972  | 405  | 108  | 36                                   | 0.0006 |
