# Supplementary material
Source: PubMed Central journal article supplement (PMC406462)

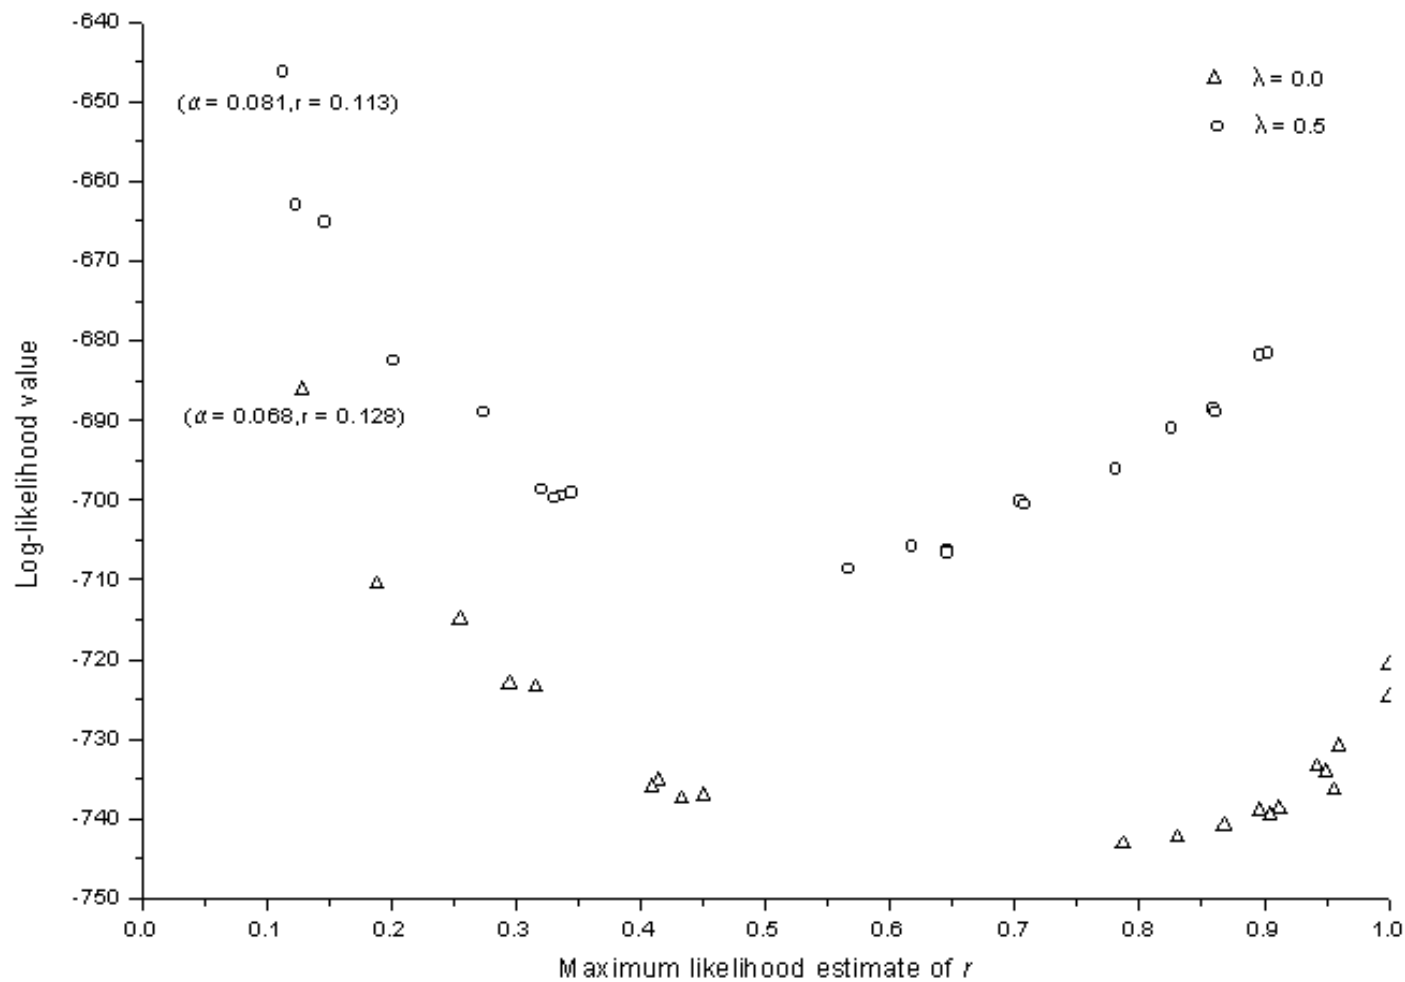

Supplement: pnas_101_18_7040__3.pdf [file pnas_101_18_7040__3.pdf]
